# Supplementary material for: First-Principles Study of AlPO4-H3, a Hydrated Aluminophosphate Zeotype Containing Two Different Types of Adsorbed Water Molecules
Source: MDPI journal article supplement (doi:10.3390/molecules24050922), 2019-03-06
Supplement: s1 [file s1]

# First-principles study of $\text{AlPO}_4\text{-H}_3$ , a hydrated aluminophosphate zeotype containing two different types of adsorbed water molecules

## SUPPORTING INFORMATION

**Michael Fischer**<sup>1,2</sup>

1 Crystallography Group, Department of Geosciences, University of Bremen,  
Klagenfurter Straße 2-4, 28359 Bremen, Germany

2 MAPEX Center for Materials and Processes, University of Bremen,  
28359 Bremen, Germany

michael.fischer@uni-bremen.de

### Individual T-O bond distances

**Table S1:** Table of experimental and DFT-optimised T-O bond distances in  $\text{AlPO}_4\text{-H}_3$  and  $\text{AlPO}_4\text{-C}$ . All bond lengths in Å.

|                | <b><math>\text{AlPO}_4\text{-H}_3</math></b> |            | <b><math>\text{AlPO}_4\text{-C}</math></b> |            |
|----------------|----------------------------------------------|------------|--------------------------------------------|------------|
|                | <b>sc-XRD [1]</b>                            | <b>DFT</b> | <b>PXRD [2]</b>                            | <b>DFT</b> |
| <b>Al1-O2</b>  | 1.735                                        | 1.763      | 1.682                                      | 1.751      |
| <b>Al1-O3</b>  | 1.724                                        | 1.749      | 1.744                                      | 1.758      |
| <b>Al1-O4</b>  | 1.743                                        | 1.772      | 1.665                                      | 1.761      |
| <b>Al1-O6</b>  | 1.729                                        | 1.749      | 1.773                                      | 1.762      |
| <b>Al2-O1</b>  | 1.851                                        | 1.887      | 1.789                                      | 1.761      |
| <b>Al2-O5</b>  | 1.859                                        | 1.880      | 1.771                                      | 1.756      |
| <b>Al2-O7</b>  | 1.842                                        | 1.865      | 1.700                                      | 1.762      |
| <b>Al2-O8</b>  | 1.835                                        | 1.859      | 1.719                                      | 1.742      |
| <b>Al2-O9</b>  | 1.967                                        | 1.981      | -                                          | -          |
| <b>Al2-O10</b> | 1.951                                        | 1.965      | -                                          | -          |
| <b>P1-O1</b>   | 1.501                                        | 1.516      | 1.492                                      | 1.540      |
| <b>P1-O2</b>   | 1.531                                        | 1.547      | 1.590                                      | 1.544      |
| <b>P1-O3</b>   | 1.529                                        | 1.543      | 1.475                                      | 1.534      |
| <b>P1-O4</b>   | 1.538                                        | 1.558      | 1.551                                      | 1.540      |
| <b>P2-O5</b>   | 1.525                                        | 1.543      | 1.495                                      | 1.535      |
| <b>P2-O6</b>   | 1.535                                        | 1.552      | 1.568                                      | 1.544      |
| <b>P2-O7</b>   | 1.527                                        | 1.546      | 1.493                                      | 1.539      |
| <b>P2-O8</b>   | 1.506                                        | 1.515      | 1.517                                      | 1.532      |

## Partially hydrated phases

**Table S2:** Lattice parameters of DFT-optimised partially hydrated APC phases.

|                            | H <sub>2</sub> O(1) | H <sub>2</sub> O(2) | H <sub>2</sub> O(pore) | <i>a</i> / Å | <i>b</i> / Å | <i>c</i> / Å | <i>V</i> / Å <sup>3</sup> |
|----------------------------|---------------------|---------------------|------------------------|--------------|--------------|--------------|---------------------------|
| <b>AlPO<sub>4</sub>-H3</b> | 8                   | 8                   | 8                      | 19.498       | 9.751        | 9.795        | 1862.3                    |
| <b>2/3 hydrated</b>        | 8                   | 8                   | 0                      | 19.819       | 9.309        | 9.942        | 1834.3                    |
|                            | 8                   | 0                   | 8                      | 19.598       | 10.193       | 8.973        | 1792.3                    |
|                            | 0                   | 8                   | 8                      | 15.723       | 9.679        | 9.681        | 1473.3                    |
| <b>1/3 hydrated</b>        | 8                   | 0                   | 0                      | 19.655       | 9.768        | 9.781        | 1877.8                    |
|                            | 0                   | 8                   | 0                      | 16.653       | 10.101       | 9.627        | 1619.3                    |
|                            | 0                   | 0                   | 8                      | 21.415       | 9.380        | 8.328        | 1672.8                    |
| <b>AlPO<sub>4</sub>-C</b>  | 0                   | 0                   | 0                      | 20.392       | 9.648        | 8.825        | 1763.3                    |

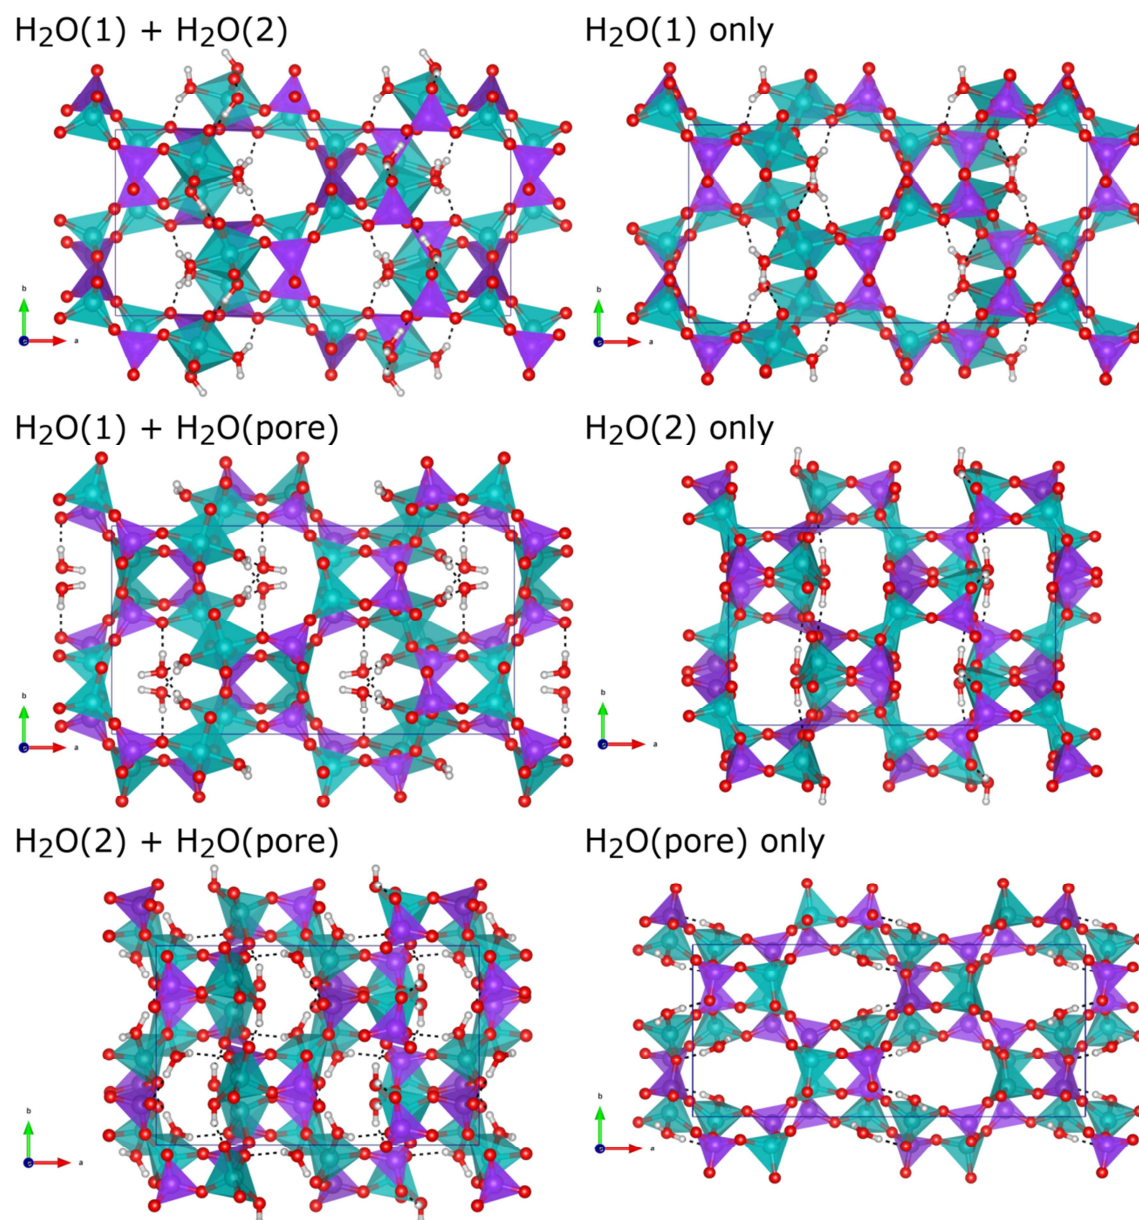

**Figure S1:** Visualisation of DFT-optimised partially hydrated APC phases.

## Displacement parameters

**Table S3:** Anisotropic displacement parameters  $U_{ij}$  of  $\text{AlPO}_4\text{-H3}$  as obtained from phonon calculations. The  $U_{iso}(\text{phonon})$  values calculated from the anisotropic values are also included. All values in  $\text{\AA}^2$ .

|     | $U_{11}$ | $U_{22}$ | $U_{33}$ | $U_{23}$ | $U_{31}$ | $U_{12}$ | $U_{iso}$ |
|-----|----------|----------|----------|----------|----------|----------|-----------|
| Al1 | 0.0068   | 0.0112   | 0.0058   | 0.0003   | 0.0002   | 0.0038   | 0.0079    |
| Al2 | 0.0066   | 0.0085   | 0.0057   | 0.0006   | 0.0005   | 0.0024   | 0.0069    |
| P1  | 0.0050   | 0.0102   | 0.0064   | 0.0015   | -0.0002  | -0.0026  | 0.0072    |
| P2  | 0.0081   | 0.0077   | 0.0052   | -0.0001  | -0.0006  | -0.0043  | 0.0070    |
| O1  | 0.0069   | 0.0136   | 0.0257   | -0.0017  | 0.0018   | 0.0002   | 0.0154    |
| O2  | 0.0277   | 0.0233   | 0.0069   | -0.0042  | 0.0019   | -0.0037  | 0.0193    |
| O3  | 0.0211   | 0.0282   | 0.0197   | 0.0012   | -0.0036  | -0.0201  | 0.0230    |
| O4  | 0.0149   | 0.0161   | 0.0110   | 0.0053   | 0.0021   | 0.0050   | 0.0140    |
| O5  | 0.0283   | 0.0121   | 0.0052   | -0.0006  | 0.0008   | -0.0099  | 0.0152    |
| O6  | 0.0105   | 0.0157   | 0.0309   | -0.0051  | 0.0003   | -0.0008  | 0.0190    |
| O7  | 0.0209   | 0.0093   | 0.0076   | 0.0021   | -0.0012  | -0.0025  | 0.0126    |
| O8  | 0.0176   | 0.0167   | 0.0102   | -0.0029  | 0.0036   | 0.0099   | 0.0148    |
| O9  | 0.0093   | 0.0398   | 0.0188   | 0.0020   | -0.0014  | -0.0021  | 0.0226    |
| H1  | 0.0231   | 0.0613   | 0.0345   | 0.0067   | -0.0094  | 0.0018   | 0.0397    |
| H2  | 0.0208   | 0.0571   | 0.0315   | 0.0009   | 0.0054   | -0.0060  | 0.0365    |
| O10 | 0.0177   | 0.0092   | 0.0094   | -0.0012  | -0.0004  | -0.0007  | 0.0121    |
| H3  | 0.0386   | 0.0193   | 0.0256   | 0.0012   | 0.0010   | -0.0091  | 0.0278    |
| H4  | 0.0354   | 0.0227   | 0.0146   | -0.0003  | 0.0019   | -0.0035  | 0.0242    |
| O11 | 0.0168   | 0.0359   | 0.0406   | 0.0012   | 0.0021   | -0.0002  | 0.0311    |
| H5  | 0.0704   | 0.0448   | 0.0655   | 0.0052   | -0.0106  | -0.0195  | 0.0602    |
| H6  | 0.0215   | 0.0607   | 0.0572   | -0.0067  | -0.0022  | 0.0040   | 0.0465    |

**Table S4:** Anisotropic displacement parameters  $U_{ij}$  of  $\text{AlPO}_4\text{-C}$  as obtained from phonon calculations. The  $U_{iso}(\text{phonon})$  values calculated from the anisotropic values are also included. All values in  $\text{\AA}^2$ .

|     | $U_{11}$ | $U_{22}$ | $U_{33}$ | $U_{23}$ | $U_{31}$ | $U_{12}$ | $U_{iso}$ |
|-----|----------|----------|----------|----------|----------|----------|-----------|
| Al1 | 0.0069   | 0.0109   | 0.0082   | 0.0025   | 0.0019   | 0.0042   | 0.0086    |
| Al2 | 0.0069   | 0.0060   | 0.0101   | 0.0000   | 0.0017   | 0.0017   | 0.0077    |
| P1  | 0.0066   | 0.0088   | 0.0063   | -0.0002  | 0.0007   | -0.0035  | 0.0072    |
| P2  | 0.0064   | 0.0063   | 0.0102   | 0.0011   | -0.0015  | -0.0023  | 0.0076    |
| O1  | 0.0078   | 0.0173   | 0.0266   | 0.0030   | -0.0004  | -0.0010  | 0.0172    |
| O2  | 0.0237   | 0.0182   | 0.0087   | 0.0054   | 0.0017   | 0.0035   | 0.0169    |
| O3  | 0.0146   | 0.0174   | 0.0109   | -0.0023  | 0.0028   | -0.0116  | 0.0143    |
| O4  | 0.0199   | 0.0123   | 0.0100   | 0.0030   | 0.0009   | 0.0001   | 0.0141    |
| O5  | 0.0206   | 0.0164   | 0.0126   | 0.0058   | 0.0010   | -0.0007  | 0.0165    |
| O6  | 0.0081   | 0.0222   | 0.0296   | -0.0028  | 0.0012   | 0.0013   | 0.0200    |
| O7  | 0.0241   | 0.0070   | 0.0149   | 0.0027   | 0.0002   | -0.0007  | 0.0154    |
| O8  | 0.0215   | 0.0154   | 0.0190   | 0.0016   | 0.0091   | 0.0119   | 0.0186    |

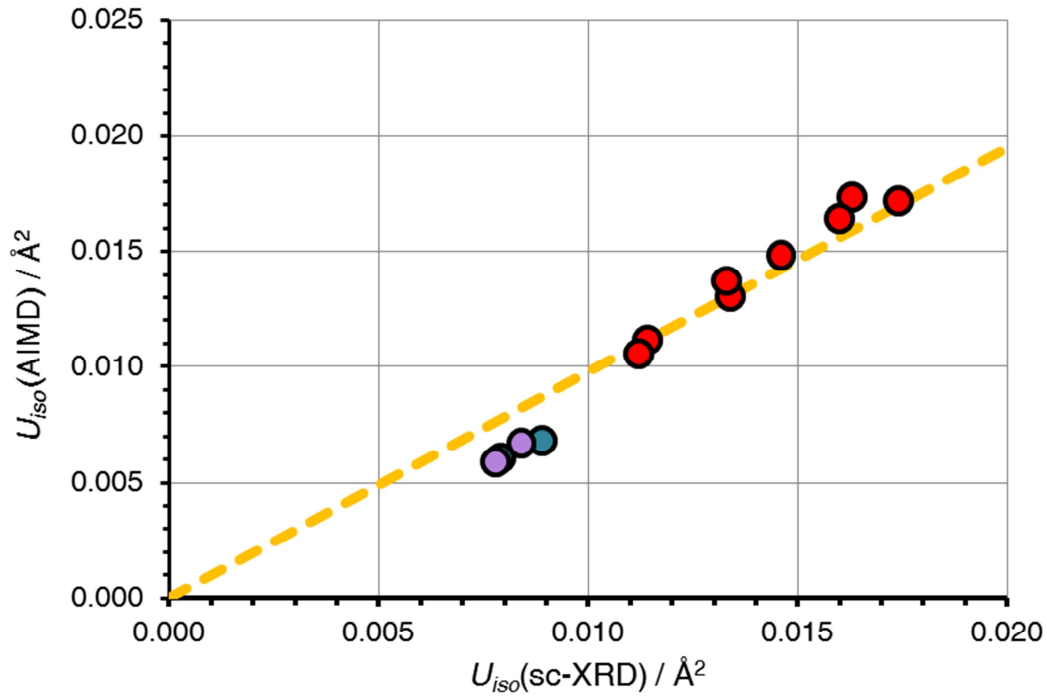

**Figure S2:** Plot of isotropic displacement parameters  $U_{iso}$  obtained from AIMD calculations as a function of the corresponding experimental values [1]. Only framework atoms are included (Al = cyan, P = purple, O1 to O8 = red). The yellow line shows a linear correlation with intercept 0.978 ( $R^2 = 0.930$ ).

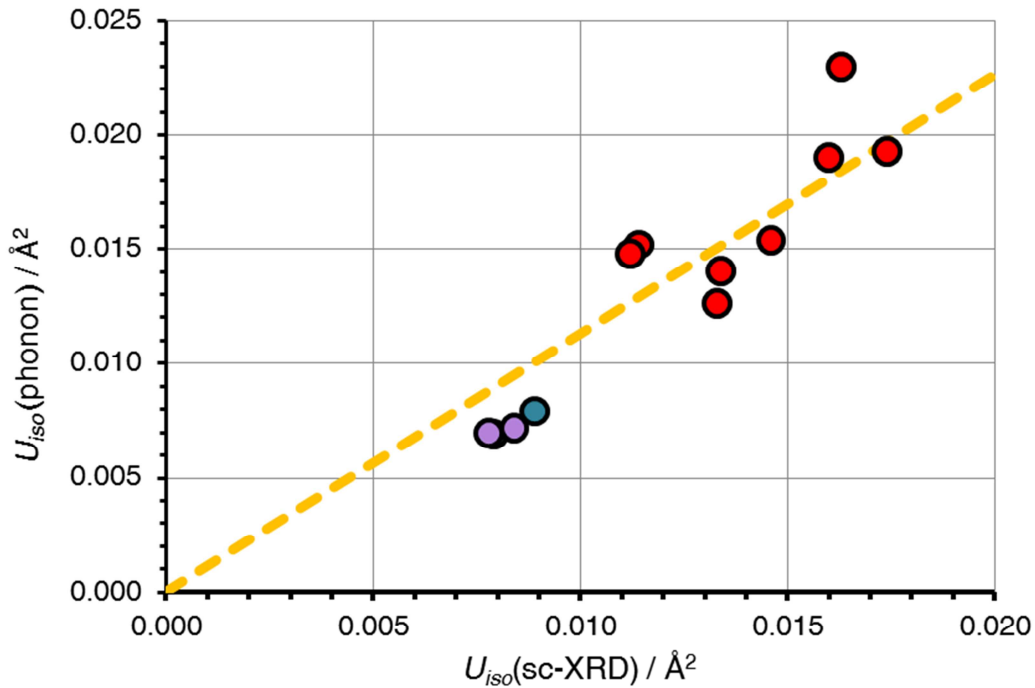

**Figure S3:** Plot of isotropic displacement parameters  $U_{iso}$  obtained from phonon calculations as a function of the corresponding experimental values [1]. Only framework atoms are included (Al = cyan, P = purple, O1 to O8 = red). The yellow line shows a linear correlation with intercept 1.131 ( $R^2 = 0.821$ ).

## Radial distribution functions

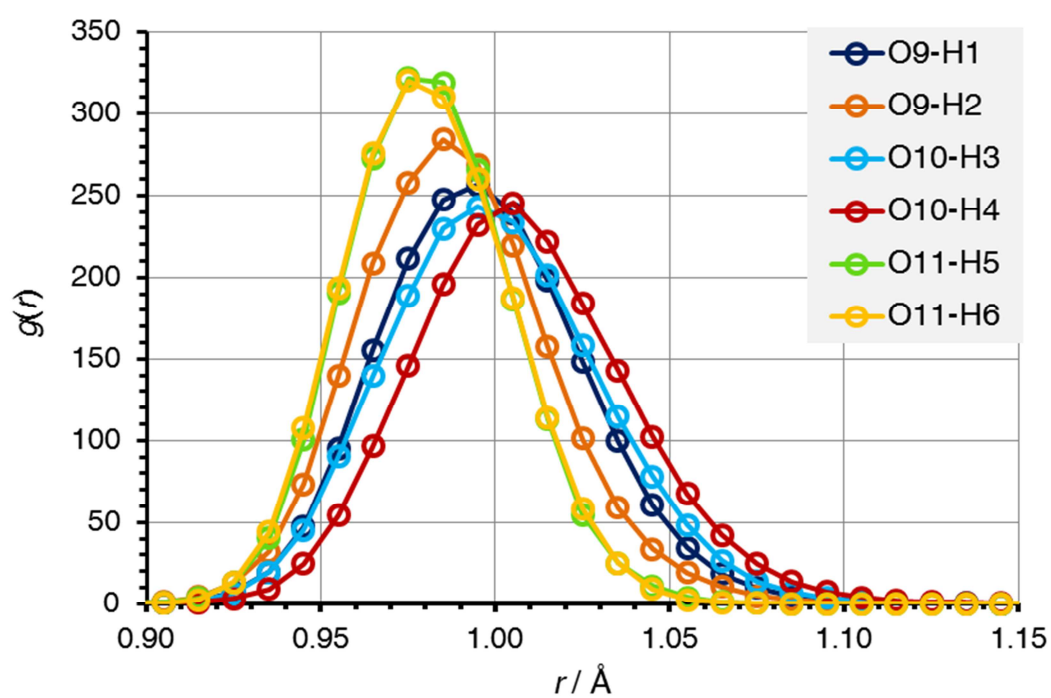

**Figure S4:** O-H radial distribution functions for the three water molecules.

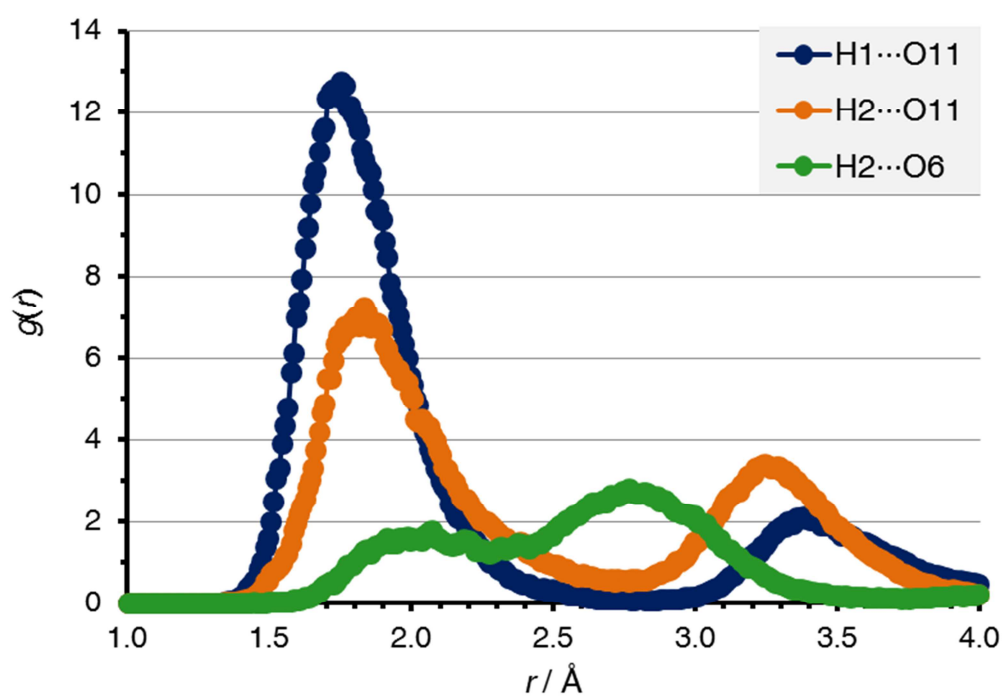

**Figure S5:** H...O radial distribution functions for the  $\text{H}_2\text{O}(1)$  molecule.

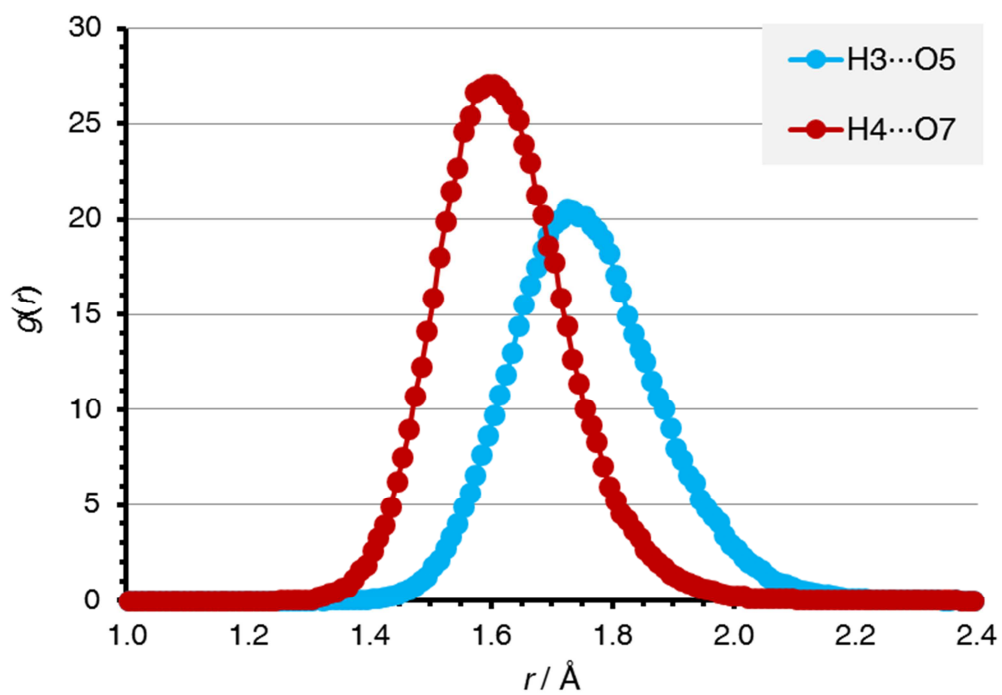

**Figure S6:** H...O radial distribution functions for the  $\text{H}_2\text{O}(2)$  molecule.

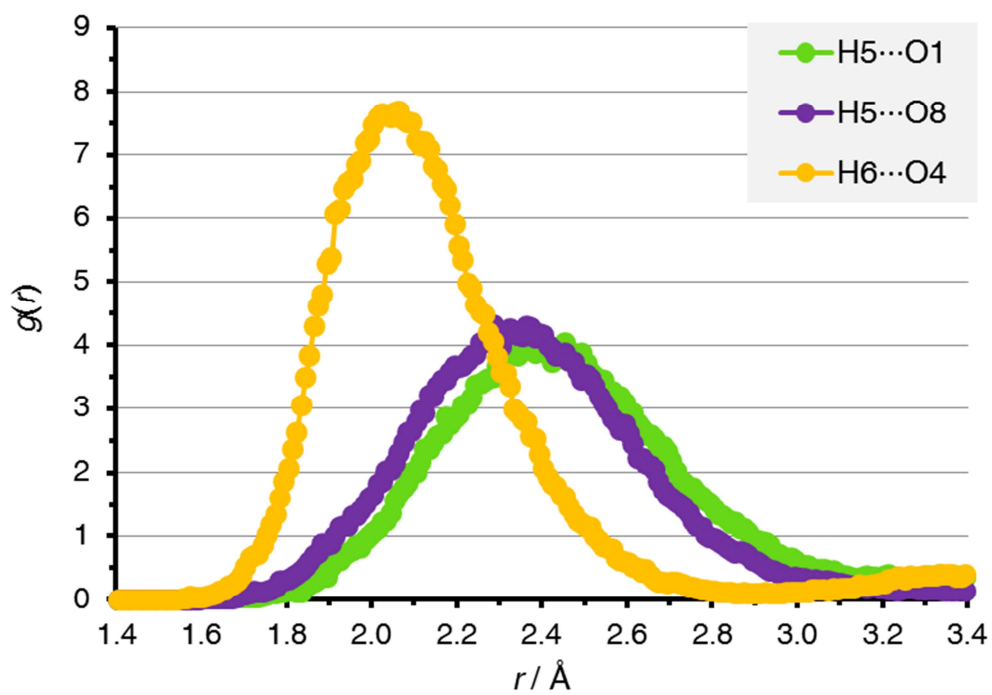

**Figure S7:** H...O radial distribution functions for the  $\text{H}_2\text{O}(\text{pore})$  molecule.

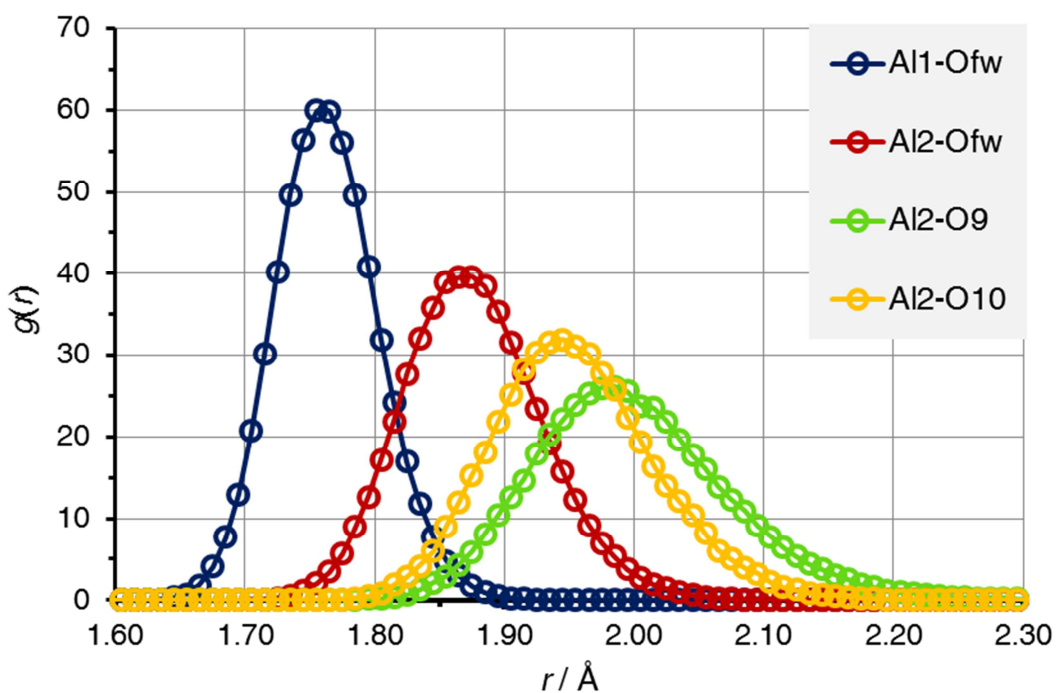

**Figure S8:** Al-O radial distribution functions. O<sub>fw</sub> designates framework oxygen atoms.

## References

1. Pluth, J.J.; Smith, J. V Hydrated aluminophosphate (AlPO<sub>4</sub>·1.5H<sub>2</sub>O) with PO<sub>4</sub>, AlO<sub>4</sub> and AlO<sub>4</sub>(H<sub>2</sub>O)<sub>2</sub> groups and encapsulated water. *Acta Crystallogr. Sect. C Cryst. Struct. Commun.* **1986**, *42*, 1118–1120.
2. Keller, E.; Meier, W.M.; Kirchner, R.M. Synthesis, structures of AlPO<sub>4</sub>-C and AlPO<sub>4</sub>-D, and their topotactic transformation. *Solid State Ionics* **1990**, *43*, 93–102.
